# Supplementary material for: Astragali radix total flavonoid synergizes cisplatin to inhibit proliferation and enhances the chemosensitivity of laryngeal squamous cell carcinoma
Source: Royal Society of Chemistry journal article supplement (doi:10.1039/c9ra04701h), 2019-01-01
Supplement: c9ra04701h1.pdf [file c9ra04701h1.pdf]

Table S1 The information for laryngeal squamous cell carcinoma and TFA shared targets.

| Gene  | Uniprot | Gene Full Name                              | Protein Class                               | Degree | FC    |
|-------|---------|---------------------------------------------|---------------------------------------------|--------|-------|
| EGFR  | P00533  | epidermal growth factor<br>receptor         | tyrosine-protein kinase                     | 9      | 2.49  |
| ERBB2 | P04626  | receptor tyrosine-protein kinase<br>erbB-2  | tyrosine-protein kinase                     | 7      | -2.08 |
| ERBB4 | Q15303  | receptor tyrosine-protein kinase<br>erbB-4  | tyrosine-protein kinase                     | 3      | -13.5 |
| MMP1  | P03956  | matrix metallopeptidase 1                   | hydrolase;<br>metalloprotease               | 3      | 49.49 |
| MMP3  | P08254  | matrix metallopeptidase 3                   | hydrolase;<br>metalloprotease               | 2      | 13.34 |
| NRAS  | P01111  | neuroblastoma RAS viral<br>oncogene homolog | enzyme modulator                            | 3      | 2.50  |
| NOX4  | Q9NPH5  | NADPH oxidase 4                             | oxidoreductase                              | 1      | 2.34  |
| TOP2A | P11388  | topoisomerase (DNA) II alpha                | DNA-binding;<br>isomerase;<br>topoisomerase | 2      | 3.70  |
| DRD1  | P21728  | dopamine D1 receptor                        | G-protein coupled<br>receptor; transducer   | 2      | -2.53 |
| MAOB  | P27338  | monoamine oxidase B                         | oxidoreductase                              | 2      | -2.70 |
| ACHE  | P22303  | Acetylcholinesterase                        | hydrolase                                   | 2      | -2    |
| CA9   | Q16790  | carbonic anhydrase 9                        | lyase                                       | 2      | 12.64 |

|         |        |                                   |                                                                    |   |       |
|---------|--------|-----------------------------------|--------------------------------------------------------------------|---|-------|
| ALDH1A1 | P00352 | retinal dehydrogenase 1           | oxidoreductase                                                     | 3 | -2.50 |
| ALDH1A2 | O94788 | retinal dehydrogenase 2           | oxidoreductase                                                     | 1 | -2.50 |
| ALOX12B | O75342 | epidermis-type lipoxygenase 12    | oxidoreductase                                                     | 1 | 2.11  |
| ALOX15  | P16050 | arachidonate 15-lipoxygenase      | oxidoreductase                                                     | 1 | -2.61 |
| DCT     | P40126 | dopachrome tautomerase            | isomerase                                                          | 0 | -4.54 |
| CYP1B1  | Q16678 | cytochrome P450 1B1               | oxidoreductase                                                     | 0 | -2.46 |
| DAPK1   | P53355 | death associated protein kinase 1 | calmodulin-binding;<br>kinase; serine/threonine-<br>protein kinase | 0 | 2     |

FC: Fold change, the positive value indicates that the cancer is up-regulated compared with the adjacent cancer, and the negative value indicates that the cancer is down-regulated.

Table S2 Molecular docking results of targets and compounds.

| No. | Compounds                                          | Docking number | Targets Symbol (docking score <sup>a</sup> )                                                                                                                                            |
|-----|----------------------------------------------------|----------------|-----------------------------------------------------------------------------------------------------------------------------------------------------------------------------------------|
| 1   | formononetin                                       | 2              | MAOB (5.924); ALOX15 (4.817)                                                                                                                                                            |
| 2   | ononin                                             | 13             | MAOB (7.772); ALOX15(7.634); TOP2A(7.374); DAPK1 (6.442); EGFR(6.371); ALDH1A2(6.225); ALDH1A1(6.223); MMP3(6.176); ERBB2(5.576); NRAS(5.636); MMP1 (5.562); ACHE (5.513); ERBB4(5.502) |
| 3   | calycosin                                          | 3              | MAOB(5.229); ALOX15(4.547); TOP2A (4.537)                                                                                                                                               |
| 4   | calycosin-7-O- $\beta$ -D-glucoside                | 13             | MAOB(7.774); ALOX15(7.603); TOP2A(6.99); EGFR(6.285);DAPK1(6.269); ALDH1A2(6.201); ALDH1A1(6.143);MMP3(6.144); MMP1(6.048); ACHE(5.566); NRAS(5.386);ERBB2(5.528); ERBB4(5.527)         |
| 5   | 7,2'-dihydroxy-3',4'-dimethoxyisoflavan            | 4              | MAOB(5.414); TOP2A(5.406); ALOX15(5.235); DAPK1(4.675)                                                                                                                                  |
| 6   | 7,2'-dihydroxy-3',4'-dimethoxyisoflavan eglucoside | 13             | TOP2A(7.976); MAOB(7.937); ALOX15(7.87); DAPK1(6.775); ALDH1A1(6.412); EGFR(6.4); MMP3(6.344); ALDH1A2(6.276); MMP1(6.189); NRAS(6.155); ACHE (5.733); ERBB2(5.706); ERBB4(5.643)       |
| 7   | 3-hydroxy-9,10-dimethoxypterocarp an               | 11             | MMP3(7.139); ALDH1A2(7.125); ALDH1A1(7.105); DAPK1(6.883); ALOX15(6.806); MMP1(6.741);EGFR(6.467); MAOB(6.061); ERBB2(5.659); ACHE(5.142); ERBB4(4.958)                                 |

---

|   |                                                                  |    |                                                                                                                                                                                              |
|---|------------------------------------------------------------------|----|----------------------------------------------------------------------------------------------------------------------------------------------------------------------------------------------|
| 8 | 9, 10-<br>dimethoxypterocarp<br>an-3-O- $\beta$ -D-<br>glucoside | 13 | TOP2A(8.013); MAOB(7.971); ALOX15(7.92);<br>DAPK1(7.147); NRAS(6.674); ERBB2(6.649);<br>ALDH1A1(6.435); ALDH1A2(6.293); MMP3(6.28);<br>MMP1(6.136);ACHE(5.675); EGFR(5.666);<br>ERBB4(5.657) |
|---|------------------------------------------------------------------|----|----------------------------------------------------------------------------------------------------------------------------------------------------------------------------------------------|

---

a: The results were screened out with docking score >4.52.
